# Supplementary material for: Anticancer Activity of Nano Uncaria gambir
Source: Research Square preprint supplement (doi:10.21203/rs.3.rs-1497841/v1), 2022-04-21
Supplement: Supplementary file 1 [file 973c8ec4235f0132b79a96e7.docx]

**Supplementary Data**

**Anticancer Activity of Nano *Uncaria gambir***

Andika Pramudya Wardana1,2, Nanik Siti Aminah2,3*, Alfinda Novi Kristanti2,3, Haninda Iffatuz Zahrah4, Mochamad Zakki Fahmi2, Anita Yuliati4, Suhaili2, and M. Iqbal Choudhary5,6

1Ph.D. Student of Mathematics and Natural Sciences, Faculty of Science and Technology, Universitas Airlangga, Komplek Kampus C UNAIR, Jl. Mulyorejo, 60115, Surabaya, Indonesia

2Department of Chemistry, Faculty of Science and Technology, Universitas Airlangga, Kampus C-UNAIR, Jl. Mulyorejo, Surabaya 60115, Surabaya, Indonesia

3Biotechnology of Tropical Medicinal Plants Research Group, Universitas Airlangga
4Faculty of Dental Medicine, Universitas Airlangga, Kampus A-UNAIR, Jl. Mayjen Prof. Dr. Moestopo 47, Surabaya 60131, Surabaya, Indonesia

5H. E. J. Research Institute of Chemistry, International Center for Chemical and Biological Sciences, University of Karachi, Karachi, 75270, Pakistan

6Adjunct Professor, Department of Chemistry, Faculty of Science and Technology, Universitas Airlangga, Komplek Kampus C UNAIR, Jl. Mulyorejo, Surabaya, Indonesia

*Correspondence: Nanik Siti Aminah

Department of Chemistry, Faculty of Science and Technology, Universitas Airlangga, Kampus C-UNAIR, Jl. Mulyorejo, Surabaya 60115, Surabaya, Indonesia

Tel +62-31-5936501

Fax +62-31-5936502

Email nanik-s-a@fst.unair.ac.id
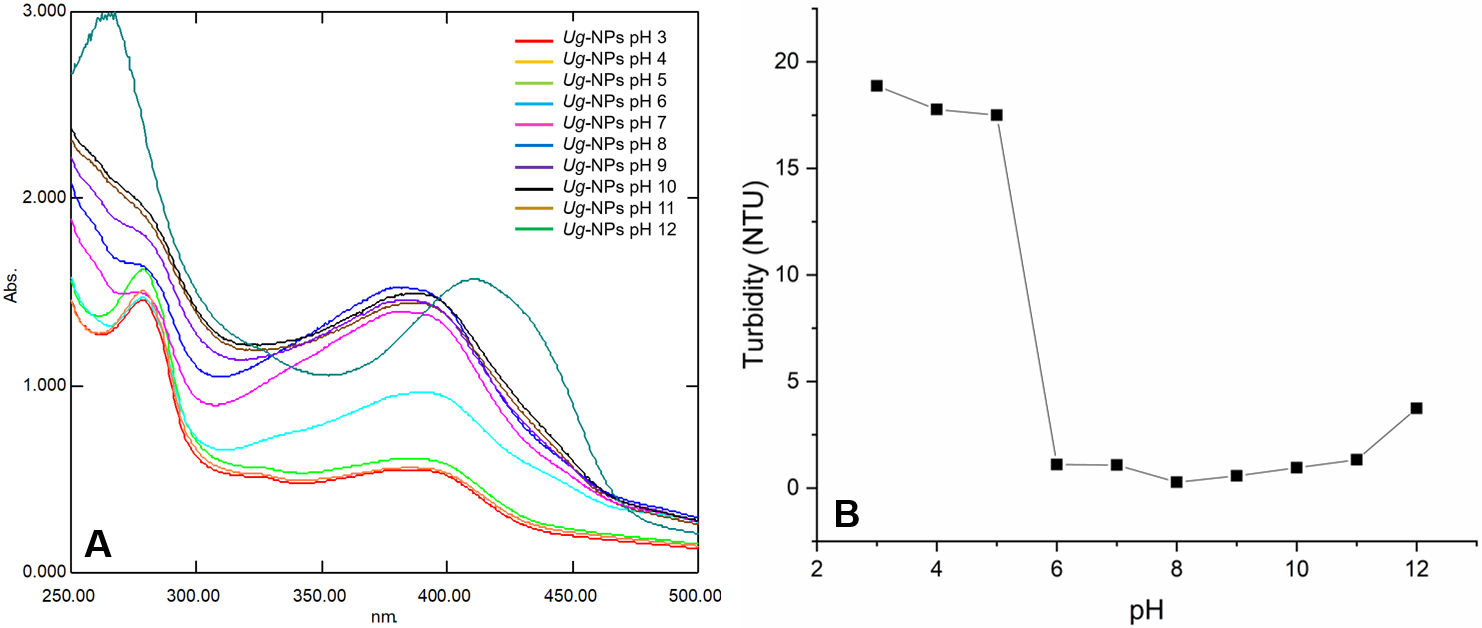


**Supplementary Figure 1.** Effect of pH on the stability of *Ug*-NPs A) UV-Vis Spectra, and B) Turbidity


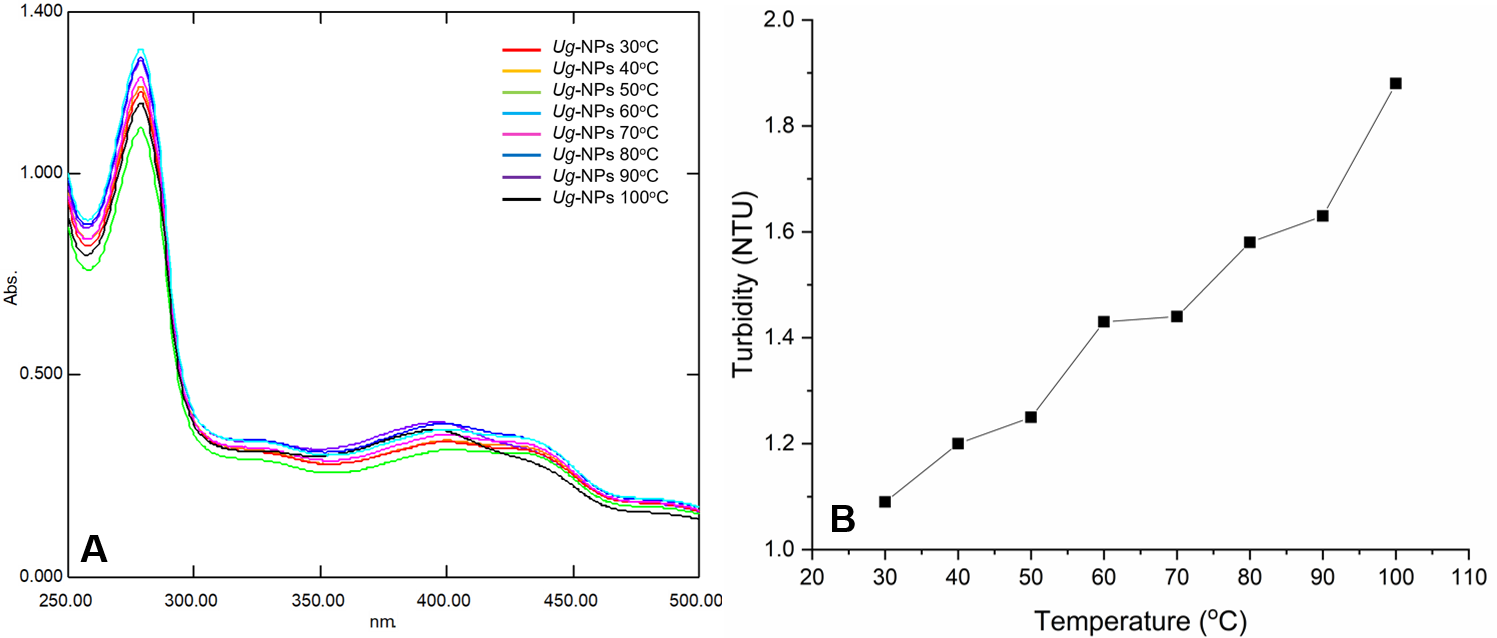


**Supplementary Figure 2.** Effect of temperature on the stability of *Ug*-NPs **A)** UV-Vis Spectra, and **B)** Turbidity

*
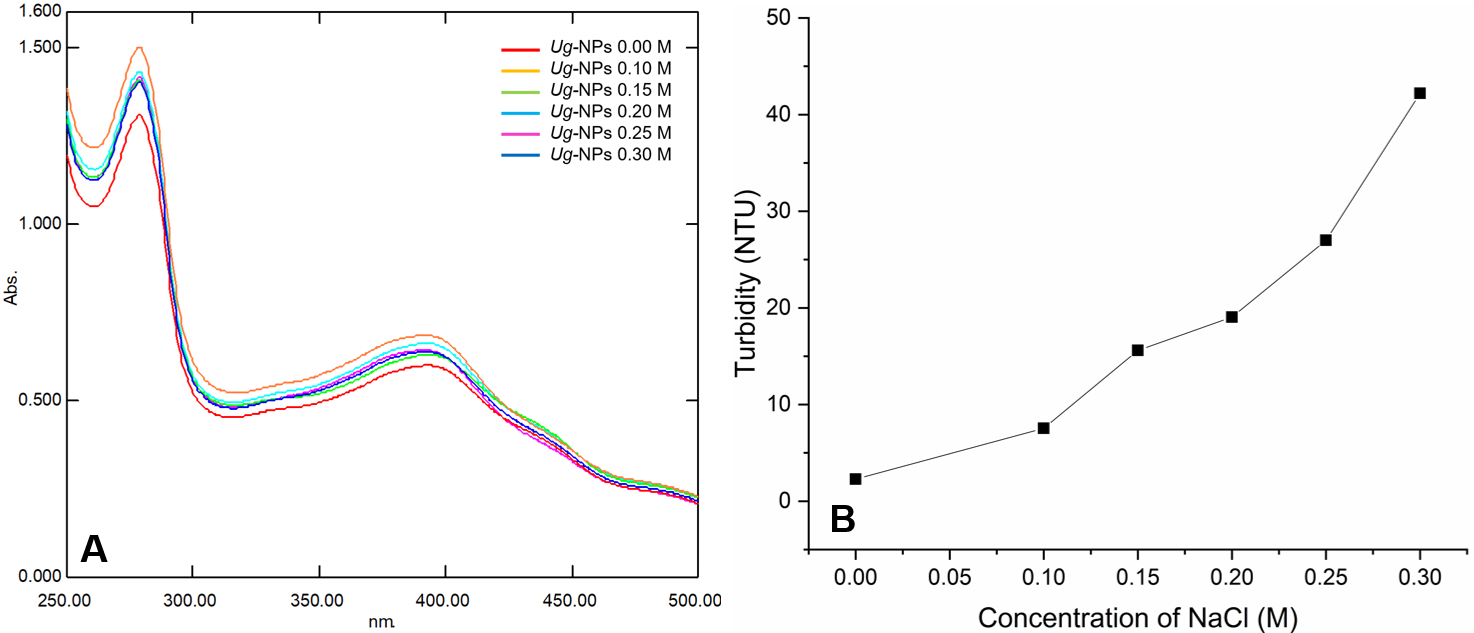
*

**Supplementary Figure 3.** Effect of NaCl on the stability of *Ug*-NPs **A)** UV-Vis Spectra, and **B)** Turbidity
